# Supplementary material for: Schiff base complex conjugates of bovine serum albumin as artificial metalloenzymes for eco-friendly enantioselective sulfoxidation
Source: Royal Society of Chemistry journal article supplement (doi:10.1039/c8ra07113f), 2018-01-01
Supplement: c8ra07113f1.pdf [file c8ra07113f1.pdf]

## Supporting Information

### Schiff base complexes conjugate of bovine serum albumins as artificial metalloenzymes for eco-friendly enantioselective sulfoxidation

**Table S1** Selected bond lengths (Å) and angles (°) for complex CrL

| Symmetry code: (A) $-x+1, -y+1, -z$ . |             |            |             |            |             |
|---------------------------------------|-------------|------------|-------------|------------|-------------|
| Cr1—O4                                | 1.983 (3)   | Cr1—O5     | 1.994 (4)   | Cr1—O6     | 1.915 (3)   |
| Cr1—O6A                               | 1.915 (3)   | Cr1—N1     | 1.991 (3)   | Cr1—N1A    | 1.991 (3)   |
| O4—Cr1—O5                             | 179.57 (15) | O4—Cr1—N1A | 89.69 (10)  | O4—Cr1—N1  | 89.69 (10)  |
| O6A—Cr1—O4                            | 91.38 (10)  | O6—Cr1—O4  | 91.38 (10)  | O6—Cr1—O5  | 88.34 (12)  |
| O6A—Cr1—O5                            | 88.34 (12)  | O6A—Cr1—O6 | 96.06 (17)  | O6—Cr1—N1A | 172.87 (11) |
| O6A—Cr1—N1A                           | 90.96 (11)  | O6A—Cr1—N1 | 172.87 (11) | O6—Cr1—N1  | 90.96 (11)  |
| N1—Cr1—O5                             | 90.63 (12)  | N1A—Cr1—O5 | 90.63 (12)  | N1—Cr1—N1A | 81.99 (15)  |

**Table S2** Enantioselective oxidation of various prochiral sulfides using BSA-ML<sup>a</sup>

| Substrate | Yield (%)                 |                          | Chemoselectivity (%)         |                             | <i>ee</i> (%)               | TOF (h <sup>-1</sup> ) | Configuration <sup>f</sup> |
|-----------|---------------------------|--------------------------|------------------------------|-----------------------------|-----------------------------|------------------------|----------------------------|
|           | BSA-CoL <sup>b</sup>      | BSA-MnL <sup>c</sup>     | BSA-VL <sup>d</sup>          | BSA-FeL <sup>d</sup>        |                             |                        |                            |
| 1         | 93, 98, 40, 465, R        | 80, 100, 32, 400, R      | 75, 100, 34, 375, R          | 75, 98, 27, 375, R          | 68, 89, 24, 340, R          |                        |                            |
| 2         | 24, 100, 51, 120, R       | 6, 100, 2, 30, S         | 93, 100, 62, 465, R          | 94, 100, 3, 470, S          | 15, 100, 5, 75, R           |                        |                            |
| 3         | 48, 100, 67, 240, R       | 58, 94, 4, 290, R        | 100, 100, 24, <b>500</b> , R | 98, 99, 4, 490, S           | 44, 100, 6, 220, R          |                        |                            |
| 4         | 77, 98, 80, 385, <b>R</b> | 26, 98, 4, 130, R        | 95, 99, 68, 475, <b>R</b>    | 87, 95, 94, 435, <b>S</b>   | 16, 100, 8, 80, R           |                        |                            |
| 5         | 56, 99, 7, 280, R         | 97, 98, 6, 485, R        | 100, 100, 32, <b>500</b> , R | 98, 100, 5, 490, S          | 100, 100, 3, <b>500</b> , R |                        |                            |
| 6         | 81, 85, 66, 405, R        | 98, 100, 6, 490, R       | 86, 100, 16, 430, R          | 92, 100, 7, 460, R          | 98, 100, 2, 490, R          |                        |                            |
| 7         | 95, 95, 3, 475, R         | 99, 99, 8, 495, <b>S</b> | 99, 99, 14, 495, <b>R</b>    | 100, 100, 3, <b>500</b> , R | 99, 99, 4, 495, R           |                        |                            |

|           |                    |                     |                     |                     |                    |
|-----------|--------------------|---------------------|---------------------|---------------------|--------------------|
| <b>8</b>  | 90, 90, 5, 450, R  | 89, 100, 9, 445, R  | 99, 100, 96, 495, R | 82, 100, 8, 410, S  | 80, 100, 8, 400, R |
| <b>9</b>  | 45, 90, 18, 225, R | 29, 92, 20, 145, S  | 84, 91, 5, 420, S   | 98, 100, 19, 490, R | 15, 100, 16, 75, S |
| <b>10</b> | 52, 78, 55, 260, R | 94, 95, 1, 376, R   | 97, 99, 3, 485, R   | 22, 27, 5, 110, S   | 87, 88, 5, 435, R  |
| <b>11</b> | 40, 100, —, 200, — | 94, 99, 4, 470, R   | 84, 99, 3, 420, R   | 98, 100, 490, —     | 86, 90, 9, 430, R  |
| <b>12</b> | 89, 96, 16, 445, R | 94, 99, 3, 470, S   | 98, 100, 22, 490, S | 93, 98, 24, 465, S  | 90, 92, 2, 450, S  |
| <b>13</b> | 38, 83, 7, 190, R  | 31, 100, 15, 155, S | 71, 98, —, 355, —   | 79, 98, 3, 395, R   | 10, 100, 5, 50, R  |

<sup>a</sup> Reactions were performed in PB (2 ml) at room temperature for 20 h. <sup>b</sup> pH = 6; The ratios of H<sub>2</sub>O<sub>2</sub>: substrate (0.068 mM): BSA-CoL were 150:100:1. <sup>c</sup> pH = 5.1; The ratios of H<sub>2</sub>O<sub>2</sub>: substrate (0.135 mM): BSA-MnL were 150:100:1. <sup>d</sup> pH = 8; The ratios of H<sub>2</sub>O<sub>2</sub>: substrate (0.203 mM): BSA-ML were 100:100:1. <sup>e</sup> pH = 6; The ratios of H<sub>2</sub>O<sub>2</sub>: substrate (0.135 mM): BSA-CrL were 200:100:1. <sup>f</sup> Assigned by HPLC elution order with known literature data.

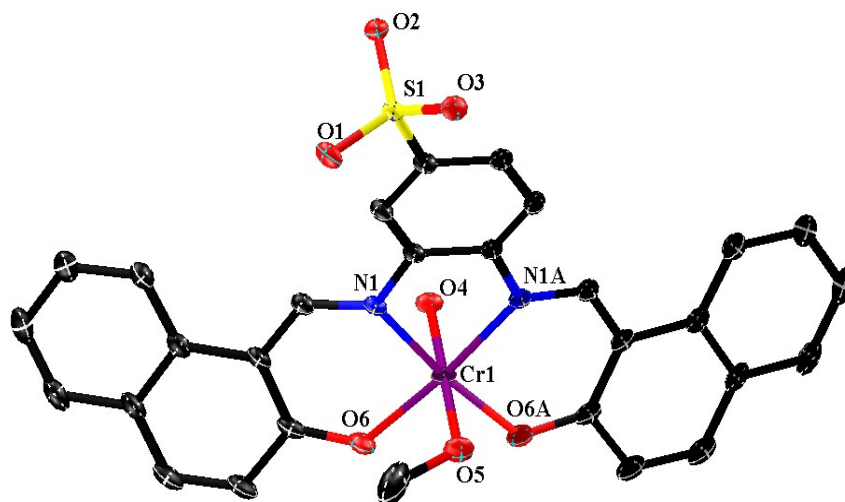

**Fig. S1** The local coordination environments of complex CrL.

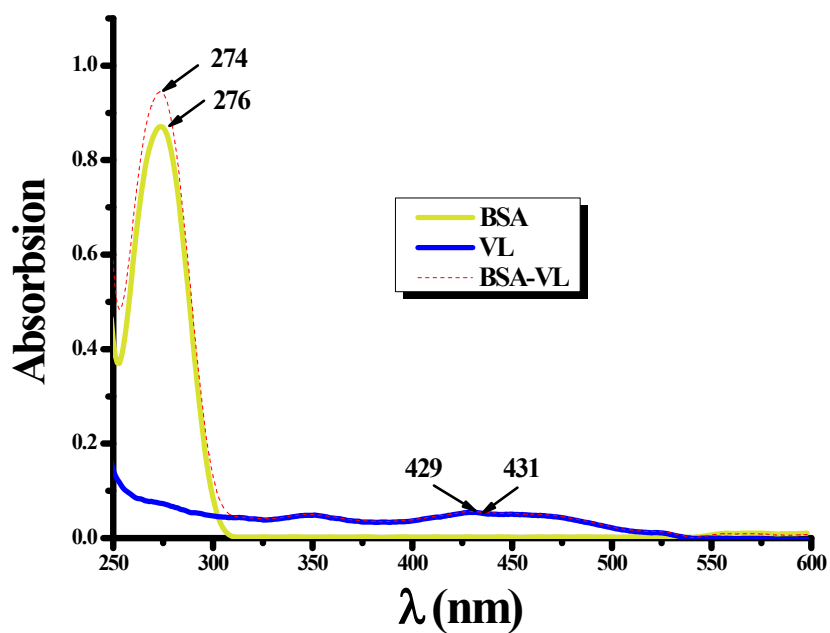

**Fig. S2** UV-visible spectra of 20  $\mu\text{M}$  BSA (yellow solid line), 20  $\mu\text{M}$  VL complex (blue solid line) and 20  $\mu\text{M}$  BSA-VL hybrid (red dashed line) in 50 mM PBS buffer pH 7.45.

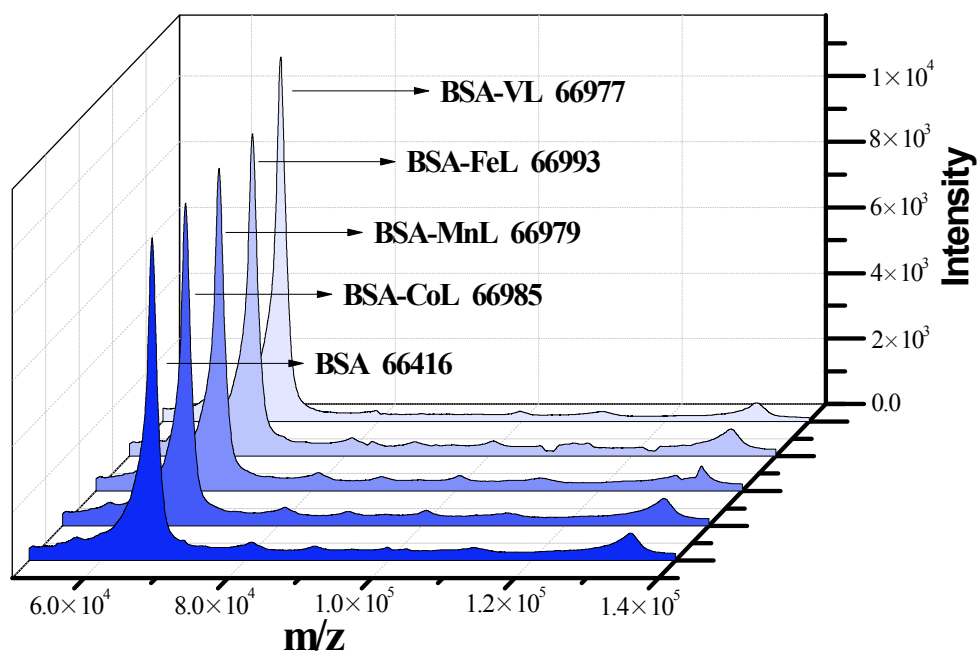

**Fig. S3** ESI-TOF MS spectrum of BSA and BSA-ML (M= Co, Mn, Fe, V).
